# Supplementary material
Source: PubMed Central journal article supplement (PMC4119285)
Supplement: mmc2.pdf [file mmc2.pdf]

## Article

Torque Generation Mechanism of F<sub>1</sub>-ATPase upon NTP Binding

Hidenobu C. Arai,<sup>1</sup> Ayako Yukawa,<sup>1</sup> Ryu John Iwatate,<sup>2</sup> Mako Kamiya,<sup>2</sup> Rikiya Watanabe,<sup>1,3</sup> Yasuteru Urano,<sup>2</sup> and Hiroyuki Noji<sup>1,\*</sup>

<sup>1</sup>Department of Applied Chemistry, School of Engineering, The University of Tokyo, Tokyo, Japan; <sup>2</sup>Laboratory of Chemical Biology and Molecular Imaging, School of Medicine, The University of Tokyo, Tokyo, Japan; and <sup>3</sup>PRESTO, Japan Science and Technology Agency, Tokyo, Japan

**ABSTRACT** Molecular machines fueled by NTP play pivotal roles in a wide range of cellular activities. One common feature among NTP-driven molecular machines is that NTP binding is a major force-generating step among the elementary reaction steps comprising NTP hydrolysis. To understand the mechanism in detail, in this study, we conducted a single-molecule rotation assay of the ATP-driven rotary motor protein F<sub>1</sub>-ATPase using uridine triphosphate (UTP) and a base-free nucleotide (ribose triphosphate) to investigate the impact of a pyrimidine base or base depletion on kinetics and force generation. Although the binding rates of UTP and ribose triphosphate were 10<sup>3</sup> and 10<sup>6</sup> times, respectively, slower than that of ATP, they supported rotation, generating torque comparable to that generated by ATP. Affinity change of F<sub>1</sub> to UTP coupled with rotation was determined, and the results again were comparable to those for ATP, suggesting that F<sub>1</sub> exerts torque upon the affinity change to UTP via rotation similar to ATP-driven rotation. Thus, the adenine-ring significantly enhances the binding rate, although it is not directly involved in force generation. Taking into account the findings from another study on F<sub>1</sub> with mutated phosphate-binding residues, it was proposed that progressive bond formation between the phosphate region and catalytic residues is responsible for the rotation-coupled change in affinity.

## INTRODUCTION

Chemical energy liberated from the hydrolysis of ATP is a common chemical fuel for biomolecular machines that change their own conformation to exert force on substrates or partner proteins upon ATP hydrolysis. Many ATP-driven molecular machines share highly conserved structural features, such as the p-loop (1,2) (also termed Walker motif A) and are therefore thought to also share their functional principle. One common feature among p-loop ATP-driven molecular machines is that among the elementary reaction steps comprising ATP hydrolysis, ATP binding, together with the release of inorganic phosphate (P<sub>i</sub>), is a major force-generating step, whereas chemical cleavage of the phosphate ester bond of ATP does not comparably contribute to force generation (3). Many ATP-driven molecular machines show a large conformational difference between the nucleotide-free and nucleotide-bound states (4,5), suggesting that a large conformational change occurs upon ATP binding. Thus, the ATP-binding step is crucial for the force-generation mechanism of biomolecular machines. However, several fundamental questions regarding the molecular mechanism of binding-induced force generation remain. One basic question involves the role of the chemical moieties composing NTP, i.e., the base, ribose, and phosphate, in force generation. In this study, we addressed this

issue by using ATP analogs either with a pyrimidine base or without a base structure in a single-molecule rotation assay of F<sub>1</sub>-ATPase, which is one of the best-characterized molecular motors.

F<sub>1</sub> is the water-soluble part of F<sub>0</sub>F<sub>1</sub>-ATP synthase and acts as an ATP-driven rotary motor when isolated from the membrane-embedded part of ATP synthase, F<sub>0</sub>, which is also rotary-molecular-motor-fueled by proton-motive force (pmf) across the membrane (6–8). In the F<sub>0</sub>F<sub>1</sub>-ATP synthase complex, F<sub>1</sub> and F<sub>0</sub> are connected to intertransmit torque. Under physiological conditions where pmf is sufficiently large, F<sub>0</sub> exerts larger torque than F<sub>1</sub>, leading to reverse rotation in F<sub>1</sub>. As a result, the reverse reaction of ATP hydrolysis, ATP synthesis, is catalyzed by F<sub>1</sub> (9,10). The catalysis of F<sub>0</sub>F<sub>1</sub>-ATP synthase is reversible: when pmf decreases, F<sub>1</sub> reversibly rotates F<sub>0</sub>, hydrolyzing ATP to form pmf.

The minimum complex of F<sub>1</sub> as a rotary motor is the  $\alpha_3\beta_3\gamma$  subcomplex, hereafter referred to as F<sub>1</sub> for simplicity. F<sub>1</sub> is composed of the  $\alpha_3\beta_3$  stator ring and the central  $\gamma$  subunit (4,11,12). Upon ATP hydrolysis, the  $\alpha_3\beta_3$  ring rotates the  $\gamma$  subunit in the counterclockwise direction as viewed from the membrane side (from the top in Fig. 1 a) (13–17). The catalytic reaction centers are located on each  $\alpha\beta$  interface (4). The crystal structure of F<sub>1</sub> shows that most directly interacting residues reside on the  $\beta$  subunit, whereas the  $\alpha$  subunit has one of the most catalytically critical arginine residues (18–20). Each catalytic site performs

Submitted March 14, 2014, and accepted for publication May 13, 2014.

\*Correspondence: [hnoji@appchem.t.u-tokyo.ac.jp](mailto:hnoji@appchem.t.u-tokyo.ac.jp)

Hidenobu C. Arai and Ayako Yukawa contributed equally to this work.

Editor: Kazuhiro Oiwa.

© 2014 by the Biophysical Society  
0006-3495/14/07/0156/9 \$2.00

<http://dx.doi.org/10.1016/j.bpj.2014.05.016>

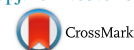

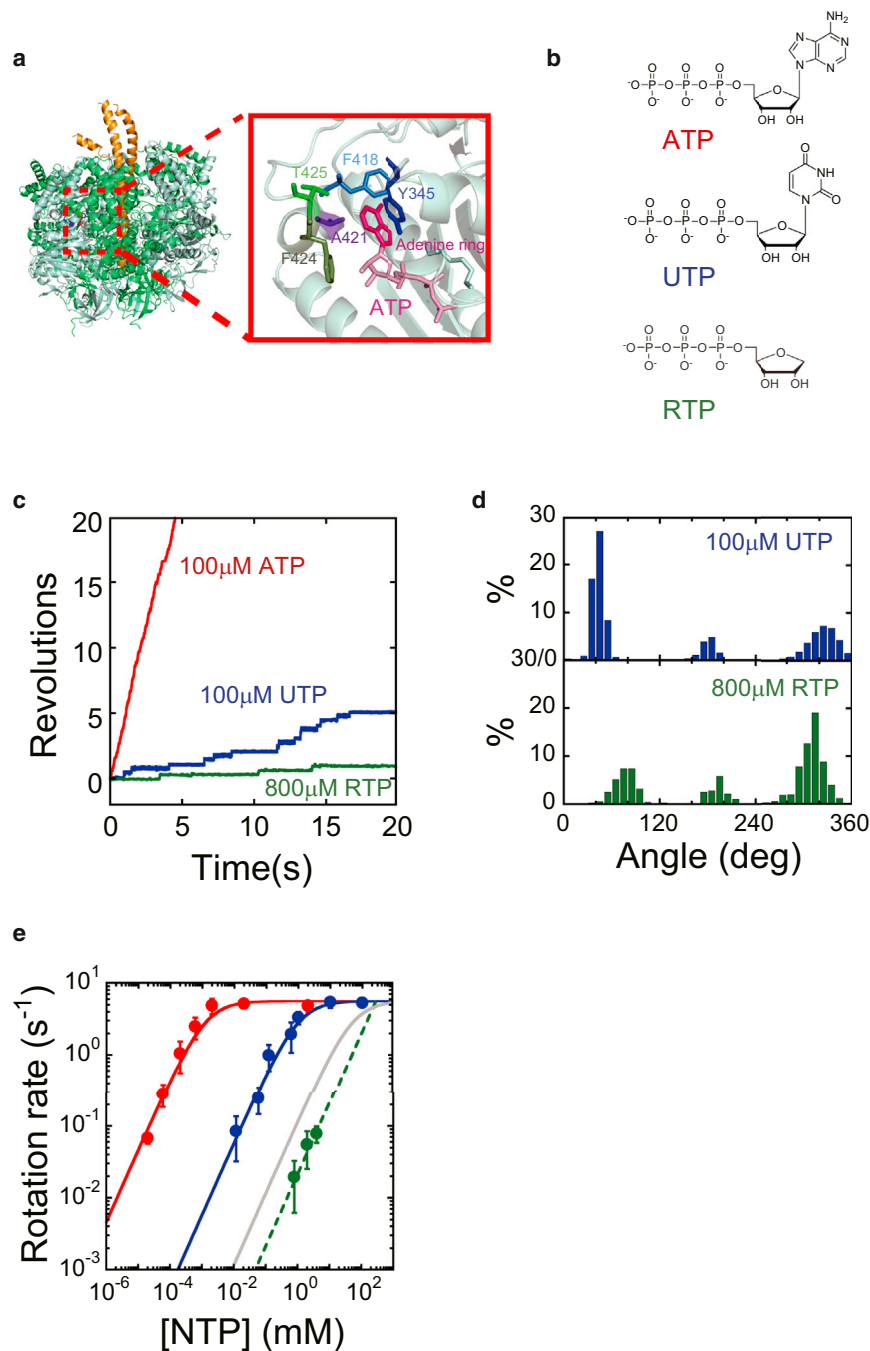

**FIGURE 1** Rotary motion of F<sub>1</sub> in the presence of UTP or RTP. (a) Side view of the crystal structure of F<sub>1</sub> (PDB code 1BMF): interface between  $\alpha_{DP}$  and  $\beta_{DP}$ . The  $\alpha$ ,  $\beta$ , and  $\gamma$  subunits are shown in green, light green, and yellow, respectively. (b) Structural formulas for ATP, UTP, and RTP. (c) Time courses of rotary motion of wild-type F<sub>1</sub> in the presence of 100  $\mu$ M ATP (red), 100  $\mu$ M UTP (blue), and 800  $\mu$ M RTP (green). (d) Histogram of the angular position during rotation, calculated from Fig. 1 c. (e) Rotational velocity ( $V$ ) at various NTP concentrations. Red, blue, and green points represent the rotational velocity in the presence of ATP, UTP, and RTP, respectively. The solid curves represent Michaelis-Menten fits with  $V = V_{\max}[NTP]/([NTP] + K_m)$ , where  $V_{\max}^{ATP} = 5.6 \text{ s}^{-1}$ ,  $V_{\max}^{UTP} = 5.6 \text{ s}^{-1}$ ,  $K_m^{ATP} = 1.2 \text{ }\mu\text{M}$ , and  $K_m^{UTP} = 9.1 \times 10^2 \text{ }\mu\text{M}$ . From these fits, the rate constants for ATP and UTP binding were calculated as  $k_{\text{on}} = 3 \times V_{\max}/K_m$ , with  $k_{\text{on}}^{ATP} = 1.4 \times 10^7 \text{ M}^{-1} \text{ s}^{-1}$ , and  $k_{\text{on}}^{UTP} = 1.8 \times 10^4 \text{ M}^{-1} \text{ s}^{-1}$ . The gray curve represents the simulated Michaelis-Menten curve produced by possible ATP contamination. The dashed curve represents the linear fit with  $V = 1/3 \times k_{\text{on}}^{RTP} \times [RTP]$ , where  $k_{\text{on}}^{RTP} = 6.3 \times 10^1 \text{ M}^{-1} \text{ s}^{-1}$ . To see this figure in color, go online.

ATP hydrolysis in a highly cooperative manner to induce the unidirectional rotation of the  $\gamma$  subunit (21).

As expected from the pseudo-threefold symmetry in the structure, F<sub>1</sub> rotates in 120° steps (22), each of which is driven by a single turnover of ATP hydrolysis (10). The 120° step is further resolved into 80° and 40° substeps (22,23). The 80° substep is triggered by ATP binding and ADP release that occur on different  $\beta$  subunits (24,25). The 40° substep is initiated by ATP hydrolysis and release of inorganic phosphate (P<sub>i</sub>), which also occur on different  $\beta$  subunits (23,24,26). In early experiments, the 80° and 40° substeps were found to

be triggered by ATP binding and ATP hydrolysis, respectively (23,27). Therefore, the angles from which the 80° and 40° substeps begin are referred to as the binding angle and the catalytic angle, respectively. The reaction scheme of catalysis and rotation has been mostly established (28), although some uncertainties still exist (8,29). According to the reaction scheme described here, each catalytic site undergoes a single turnover of the ATP hydrolysis reaction coupled with one revolution of the  $\gamma$  subunit, and the phase of the catalytic reaction state among three catalytic sites always differs by 120° (30).

The ATP binding process has been revealed to be critical for torque generation in  $F_1$ . Classic biochemical works by the Boyer group showed that the ATP releasing step is the step that requires the most energy in the ATP-synthesis reaction of  $F_0F_1$ -ATP synthase (31). This finding suggests that the ATP-binding step is the step with the greatest energy release in the ATP hydrolysis reaction. Structural studies also support this notion. Crystal structures showed that  $F_1$  takes on largely different conformational states depending on whether or not it has a bound nucleotide (4,11,12). In the nucleotide-bound form, the  $\beta$  subunit takes on a so-called closed conformation by rotating the C-terminal helical domain inward to enclose the bound nucleotide, whereas in the nucleotide-free form, the  $\beta$  subunit takes on an open conformation (4,32,33). NMR and single-fluorophore imaging experiments also have shown that the  $\beta$  subunit undergoes a large conformational change. These findings suggest that the ATP-binding process is critical for torque generation, although the large conformational change itself does not necessarily mean that it is a large energy-releasing step. A recent single-molecule manipulation study provided more direct evidence for this point, showing that the affinity of  $F_1$  for ATP exponentially increases with rotation, whereas the equilibrium constant of ATP hydrolysis increases only slightly (34,35). This observation indicates that a large amount of energy is released upon ATP binding compared with chemical cleavage of ATP.

Thus, it is well established that the binding step is a major torque-generating step for  $F_1$ . To investigate the role of the adenine ring in torque generation, we previously tested the potency of ATP analogs in a single-molecule rotation assay and found that GTP and inosine triphosphate (ITP) support this rotation, whereas uridine triphosphate (UTP) does not (36). Because the rotary torque of GTP- or ITP-driven rotation was similar to that of ATP-driven rotation, we concluded that the purine ring is crucial for energy transduction of  $F_1$ . However, it is possible that the single-molecule assay we performed in a previous study was not sufficiently sensitive to detect slow UTP-driven rotation, as implied by a biochemical study on  $F_0F_1$  (37). Recent single-molecule rotation assays are highly sensitive because of the sophistication of the experimental setup and the establishment of the protocol such that rotation at  $<0.001$  rps is detectable (R. Watanabe and Y. Matsukage, unpublished). In this study, we reanalyzed the competency of UTP to support rotation. We found active rotation in the presence of UTP, although UTP was revealed to be bound with 1000-fold lower affinity compared with ATP. This finding shows that  $F_1$  exerts torque regardless of structural differences in the base of the nucleotide, leading to the question of whether the base is necessary. To address this question, we chemically synthesized a base-free nucleotide (ribose triphosphate (RTP)) and tested its competency for rotation of  $F_1$ . Surprisingly, RTP also supported rotation of  $F_1$ , generating torque

similar to that seen in ATP-driven rotation. These findings indicate that the base of the nucleotide is not required by  $F_1$  for force generation.

## MATERIALS AND METHODS

### Rotation assay

$F_1$  from thermophile *Bacillus* PS3 was prepared as previously reported (38). To visualize the rotation of  $F_1$ , the stator region ( $\alpha_3\beta_3$ ) was fixed onto a glass surface, and magnetic beads (Seradyn, Indianapolis, IN) were attached to the rotor ( $\gamma$ ) as a rotation probe, as previously reported (28). The rotating beads were observed under a phase-contrast microscope (IX-70 or IX-71, Olympus, Tokyo, Japan). The rotation assay was performed at 25°C. The images of rotary motion were recorded at 30–2000 frames/s (FASTCAM, Photron, Tokyo, Japan and FC300M, Takex, Kyoto, Japan). Images were stored on the HDD of a computer as AVI files and analyzed using custom-made software.

## RESULTS

### Rotary motion of $F_1$ in the presence of UTP or RTP

Commercial UTP was used for the rotation assay without purification. Contaminating nucleotides in the UTP sample were below the detection limit of the chromatography analysis (see Fig. S1 in the Supporting Material), i.e., present at  $<0.0025\%$  of the UTP content. Actively rotating particles were observed in the presence of UTP in the range 6  $\mu\text{M}$  to 100 mM. Fig. 1 c shows 120° stepping rotation at 100  $\mu\text{M}$  UTP. The rotation rate obeyed a Michaelis-Menten curve with a maximum rotational rate,  $V_{\max}^{\text{UTP}}$ , of  $5.6 \text{ s}^{-1}$  and a Michaelis constant,  $K_m^{\text{UTP}}$ , of  $9.1 \times 10^2 \mu\text{M}$ . The binding rate constant of UTP,  $k_{\text{on}}^{\text{UTP}}$ , was determined as  $3 \times V_{\max}^{\text{UTP}}/K_m^{\text{UTP}}$ , or  $1.8 \times 10^4 \text{ M}^{-1} \text{ s}^{-1}$ , which is almost  $10^3$  times lower than that of ATP,  $1.4 \times 10^7 \text{ M}^{-1} \text{ s}^{-1}$ . Thus,  $k_{\text{on}}^{\text{UTP}}/k_{\text{on}}^{\text{ATP}}$  was 0.1% and definitely higher than the maximum possible ATP contamination of 0.0025%. This suggests that UTP supports the rotation of  $F_1$ . To confirm this finding, we estimated the Michaelis-Menten curve for rotation induced by possible ATP contamination (cf. Fig. 1 e, gray and blue lines). The curve produced is clearly lower than the observed rotational rate. Thus, the observed rotation cannot be attributed to possible contamination by ATP, ensuring that it was induced by UTP. This rotation assay used magnetic beads as a rotation marker, where the maximum rotational rate was limited by the viscous friction of the magnetic beads. Thus, the rotational speed indicates the magnitude of torque. The observation that  $V_{\max}^{\text{UTP}}$  was similar to  $V_{\max}^{\text{ATP}}$  indicates that the torque of UTP-driven rotation is similar to that of ATP-driven rotation. This finding is further confirmed below.

The finding that UTP can drive rotation suggests that the base structure is not critical for rotation. To address this hypothesis, we chemically synthesized a nucleotide without a base (RTP). The synthesis and purification procedures are described in the Supporting Material. RTP was

chemically synthesized from ribose, phosphorus oxychloride, and pyrophosphate to ensure that it was not contaminated by other nucleotides. The yield of RTP was low; therefore, the rotation assay was conducted at concentrations of RTP ranging from 800  $\mu\text{M}$  to 4 mM, which was the highest available concentration. Under these conditions, F<sub>1</sub> exhibited continuous unidirectional rotation with 120° steps (Fig. 1 c). Thus, it was demonstrated that the base ring structure is also not required for driving rotation. The rotation rate was proportional to the RTP concentration, confirming that RTP binding is the rate-limiting step under the concentrations tested, i.e., from 800  $\mu\text{M}$  to 4 mM. The rate constant for RTP binding ( $k_{\text{on}}^{\text{RTP}}$ ) was determined to be  $6.3 \times 10^1 \text{ M}^{-1} \text{ s}^{-1}$  (Fig. 1 e, green), which was  $2.2 \times 10^5$  times lower than that for ATP binding.

### Measurement of torque

To measure the torque of the UTP- and RTP-driven rotation of F<sub>1</sub>, we determined the angular velocity of UTP- and RTP-driven rotation based on a comparison with ATP-driven rotation for each molecule by conducting buffer-exchange experiments; the UTP or RTP buffer was exchanged to ATP buffer during observation of the rotating molecules. The angular velocity ratios of UTP- to ATP-driven rotation ( $\omega_{\text{UTP}}/\omega_{\text{ATP}}$ ) and RTP- to ATP-driven rotation ( $\omega_{\text{RTP}}/\omega_{\text{ATP}}$ )

were determined. Fig. 2 a presents typical time courses in the experiment with buffer exchange from 100  $\mu\text{M}$  UTP to 200 nM ATP, in which each slope value for the cyan lines corresponds to the angular velocity ( $\omega_{\text{UTP}}$  or  $\omega_{\text{ATP}}$ ). We performed the same experiment for RTP and collected more than five molecules for each nucleotide.  $\omega_{\text{UTP}}/\omega_{\text{ATP}}$  and  $\omega_{\text{RTP}}/\omega_{\text{ATP}}$  were  $1.0 \pm 0.2$  and  $0.9 \pm 0.5$  (Fig. 2 b), respectively. Therefore, the torque of rotation driven by UTP or RTP was comparable to that of ATP-driven rotation. Assuming that the torque driven by ATP was 43 pN·nm, based on our latest measurement of torque (R. Watanabe and Y. Matsukage et al. unpublished), that driven by UTP and RTP was determined to be 44 pN·nm and 39 pN·nm, respectively (Fig. 2 c). These results are similar to those of our previous study, in which it was found that substitution of ATP with GTP or ITP does not affect torque generation, although GTP and ITP are slow binding substrates (Fig. S3) (36).

### Rotary potential

We examined the effect of UTP and RTP on the rotary potential at the binding-waiting angle. The probability distribution of  $\gamma$ -subunit orientation during the binding-waiting pauses was measured by recording at 1000 fps, and the rotary potentials were determined from the probability

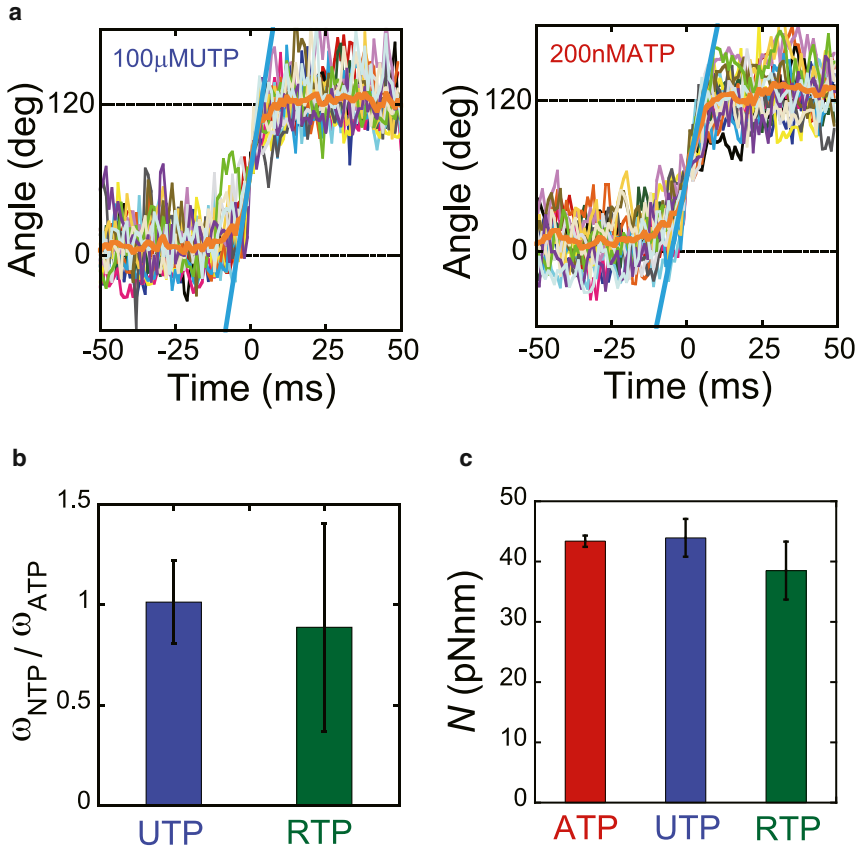

FIGURE 2 Rotary torque. (a) Time course of the stepping rotation of wild-type F<sub>1</sub> in the presence of 200 nM ATP (right) or 100  $\mu\text{M}$  UTP (left). We exchanged the buffer from 200 nM ATP to 100  $\mu\text{M}$  UTP. Thin lines show 17 successive steps, with their averages (thick orange lines). The thick cyan lines show the linear fittings of the average step between 40° and 80°. The trajectories are aligned at 60°. (b) The average angular velocity in the presence of UTP or RTP divided by that of ATP,  $\omega_{\text{NTP}}/\omega_{\text{ATP}}$ , was estimated from the slope of the fitted straight line in Fig. 2 a. (c) Torque amplitudes ( $N$ ) generated by ATP, UTP, and RTP are presented as red, blue, and green bars, respectively. To see this figure in color, go online.

distribution according to the Boltzmann law (Fig. S2 a). The determined potentials were well fitted by the harmonic function  $\Delta G = 1/2 \times \kappa \times \theta^2$ , where  $\kappa$  is the apparent torsion stiffness. The apparent torsion stiffness is determined by at least two elastic components; the elasticity of the  $\gamma$  subunit and the rotary potential between the  $\alpha\beta$  stator ring and the  $\gamma$  subunit (38). The former is the dominant factor in determining the apparent torsion stiffness of the wild-type  $F_1$  in the presence of ATP. However, when the rotary potential is largely weakened, the apparent torsion stiffness is significantly lowered, and it shows a good correlation with the rotary torque (39). Thus, the apparent stiffness is a good barometer for how stably the  $\alpha\beta$  stator ring holds the  $\gamma$  subunit. In the presence of UTP and RTP,  $F_1$  showed torsion stiffness of 69 and 64 pN·nm during the binding-waiting pauses. These values are essentially comparable to the torsion stiffness determined in the presence of ATP for comparison, 79 pN·nm, which shows that  $F_1$  retains its tight interaction between stator and rotor and hence produces a constant rotary torque of  $\sim 40$  pN·nm, even when the base is either substituted with a pyrimidine or deleted (Fig. S2 b).

### Angular dependence of UTP binding

To determine the torque generation upon affinity change of  $F_1$  to UTP, we performed single-molecule manipulation using magnetic tweezers. To manipulate  $\gamma$ -subunit rotation, a magnetic bead ( $\phi \approx 200$  nm) was attached to the  $\gamma$  subunit of  $F_1$ , and the  $\alpha_3\beta_3$  ring was immobilized on the glass surface. For the stalling experiments, the rotation of  $F_1$  was observed under UTP-limiting conditions, i.e., at a concentration of 20–200  $\mu\text{M}$ . Under these conditions,  $F_1$  shows  $120^\circ$ -interval pauses. The durations of these pauses are in inverse proportion to the concentration of UTP, confirming that they correspond to the waiting state of UTP binding. When  $F_1$  showed a UTP-waiting pause, the magnetic tweezers were turned on to arrest  $F_1$  at the target angle (Fig. 3 a). After the set period had elapsed, the magnetic tweezers were turned off to release  $F_1$  from arrest.  $F_1$  showed either of two behaviors without exception, as previously reported (35): stepping forward to the next UTP-waiting angle (Fig. 3 b, left) or returning to the original UTP-waiting angle (Fig. 3 b, right). Forward stepping indicated that  $F_1$  had already bound UTP during the stall and exerted torque on the magnetic beads. The return to the original pause angle indicated that UTP was not bound to the catalytic site, because torque cannot be generated unless  $F_1$  catalyzes the reaction. These behaviors are hereafter referred to as ON and OFF, respectively. Thus, we primarily conducted the stalling experiments at an angle of  $\pm 50^\circ$ . The following sections discuss the analysis of the probability of ON events in the total trials,  $P_{\text{ON}}$ .

The experiments were conducted at 60  $\mu\text{M}$  UTP, where the UTP-waiting time was 0.72 s (Fig. S5 b, left). Fig. 4 a

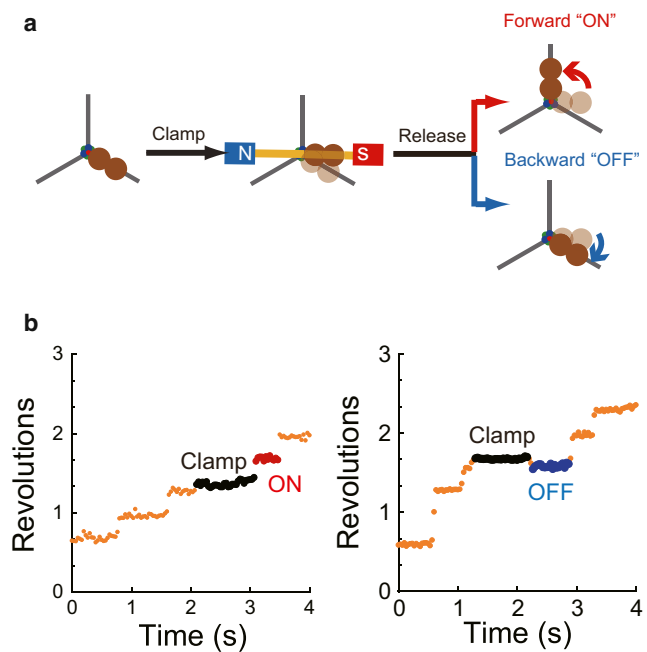

FIGURE 3 Single-molecule manipulation of  $F_1$ . (a) Schematic image of manipulation procedures. When  $F_1$  paused as a result of the UTP binding dwell, the magnetic tweezers were turned on to stall  $F_1$  at the target angle and then turned off to release the motor after the set period lapsed. The  $F_1$  released showed forward stepping (ON) or a return to the original pause angle (OFF), indicating whether or not, respectively, UTP was bound to the catalytic site. (b) Examples of the stalling experiment in the presence of 60  $\mu\text{M}$  UTP. During a pause,  $F_1$  was stalled at  $+35^\circ$  from the original pausing angle for 1.0 s and then released. After being released,  $F_1$  stepped to the next catalytic angle without moving back, indicating that UTP was bound to the catalytic site (left), or rotated back to the original pausing angle, indicating that UTP was not bound (right). To see this figure in color, go online.

shows  $P_{\text{ON}}$  plotted against the stall time.  $P_{\text{ON}}$  increased with both stall angle and stall time, similar to our previous findings for ATP binding (35). In addition,  $P_{\text{ON}}$  converged to a certain value, e.g., 60% for  $\pm 0^\circ$  stall (Fig. 4 a, black points), which showed that UTP binding is reversible. To confirm reversibility, we analyzed the dwell time of  $F_1$  when it spontaneously rotated  $120^\circ$  after an OFF event (Fig. 3 b, blue points). The dwell time histogram showed a single exponential decay, providing a rate constant of  $1.1 \text{ s}^{-1}$  (Fig. S5 b, right) corresponding to that of free rotation. This corroboration excluded the possibility of unexpected inactivation during stalling. We also plotted a histogram of the dwell time during the  $120^\circ$  step after an ON event (Fig. 3 b, red points). This histogram agreed with that observed for free rotation (Fig. S5 b, middle), confirming that manipulation did not alter the kinetic properties under this condition.

By fitting the time course of  $P_{\text{ON}}$  based on a reversible reaction scheme,  $F_1 + \text{UTP} \rightleftharpoons F_1 \cdot \text{UTP}$ , the rate constants for UTP binding and release,  $k_{\text{on}}^{\text{UTP}}$  and  $k_{\text{off}}^{\text{UTP}}$ , were determined for each stall angle (Fig. 4, b and c).  $k_{\text{on}}^{\text{UTP}}$  increased exponentially with the stall angle, by 2.4-fold per  $20^\circ$ ,

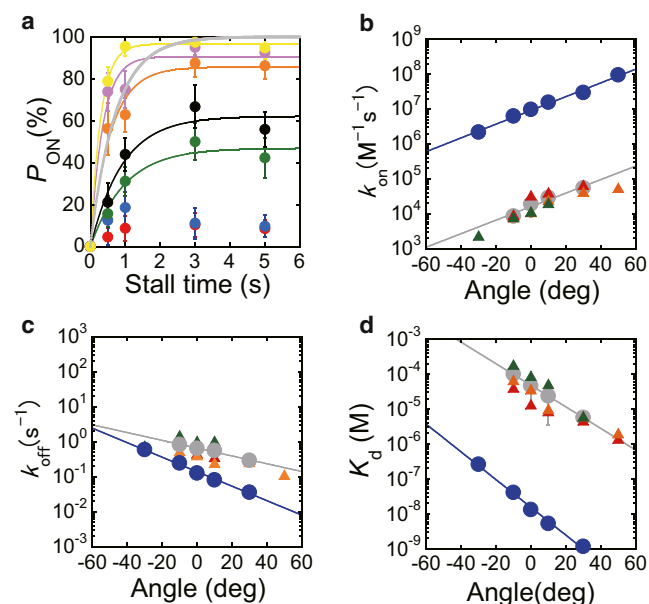

FIGURE 4 Angle dependence of UTP binding and release. (a) Time course of  $P_{ON}$  in the presence of 60  $\mu$ M UTP after stalling at  $-50^\circ$  (red),  $-30^\circ$  (blue),  $-10^\circ$  (green),  $0^\circ$  (black),  $+10^\circ$  (orange),  $+30^\circ$  (pink), and  $+50^\circ$  (yellow). The gray line represents the time course in free rotation with a time constant of 0.72 s.  $k_{on}^{UTP}$  and  $k_{off}^{UTP}$  were determined by fitting with a single-exponential function,  $P_{ON} = (k_{on}^{UTP}/(k_{on}^{UTP} + k_{off}^{UTP})) \cdot [1 - \exp(-(k_{on}^{UTP} + k_{off}^{UTP}) \times t)]$ , according to the reversible reaction scheme,  $F_1 + UTP \rightleftharpoons F_1 \cdot UTP$ . Each data point was obtained from 18–47 trials. The error of  $P_{ON}$  is given as  $\sqrt{P_{ON}(100 - P_{ON})/N}$ , where  $N$  is the number of trials for each stall measurement. (b–d) Angle dependence of  $k_{on}^{UTP}$ ,  $k_{off}^{UTP}$ , and  $K_d^{UTP}$ . Red, orange, and green symbols represent the values for stall experiments at 200  $\mu$ M, 60  $\mu$ M, and 20  $\mu$ M UTP, respectively, determined from Fig. 4 a and Fig. S4. Gray symbols represent the average values. Blue symbols represent the values determined in the presence of ATP in our previous study (35). To see this figure in color, go online.

whereas  $k_{off}^{UTP}$  decreased exponentially by a factor of 1.7, corresponding to our findings regarding increase/decrease of binding/release reported previously for ATP (35). The dissociation constant of UTP,  $K_d^{UTP}$ , decreased 4.2-fold from  $-10^\circ$  to  $+10^\circ$  (Fig. 4 d, orange points), which is similar to the previously reported angle dependence of ATP binding (Fig. 2 in our previous work (35)). To confirm the angle dependence of UTP binding under different conditions, the stalling experiment was also performed at 20  $\mu$ M and 200  $\mu$ M UTP (Fig. S4, a and b). The time course of  $P_{ON}$  in those experiments showed the same tendency observed at 60  $\mu$ M UTP (Fig. 4 a), and the reversibility of UTP binding was also confirmed from the analysis of dwell time after arrest (Fig. S5, a and c). The rate constants and dissociation constant,  $k_{on}^{UTP}$ ,  $k_{off}^{UTP}$ , and  $K_d^{UTP}$ , were determined as discussed above (Fig. 4, b–d) and showed essentially the same angle dependence observed at 60  $\mu$ M UTP, i.e., the angle dependence of UTP binding was inherent to F<sub>1</sub> at various concentrations. Thus, this study showed that base recognition of NTP does not contribute to the mechanical modulation of NTP binding.

## DISCUSSION

This work clearly shows that both of the tested nucleotides, UTP and RTP, support the unidirectional rotation of F<sub>1</sub>. In addition, the torque of UTP- or RTP-driven rotation is comparable to that of ATP-driven rotation, despite the large difference in or removal of the base. Thus, the adenine ring is not directly involved in the force-generating binding process in F<sub>1</sub>. In contrast, use of UTP or RTP had a significant impact on the rate constant of binding; the  $k_{on}$  for UTP and RTP was  $10^3$  or  $\sim 10^6$  times slower than that for ATP. These findings indicate that the adenine ring is responsible for the first docking process, but is not involved in the subsequent affinity change that accompanies the global power-stroke motion of the  $\beta$  subunit.

This scenario is consistent with structural features found in the crystal structures of F<sub>1</sub>-ATPase. In nearly all crystal structures (4,40), with only a few exceptions (41), the  $\beta$  subunit takes on two distinctive conformations, i.e., open and closed. The catalytic site in the open  $\beta$  subunit is not occupied by a nucleotide. In the closed  $\beta$  subunit, the bound nucleotide (ADP or ATP analog) resides in the catalytic site. In the structure recently determined by Rees et al. (42), Mg-free ADP was found in the open  $\beta$  subunit. A conformational comparison of the catalytic residues of closed and open  $\beta$  subunits in that structure revealed that both forms have a similar conformation for adenine binding sites but not for phosphate binding sites. Considering that the conformational transition from the open form to the closed form of the  $\beta$  subunit is the principal power-stroke motion of  $\beta$  induced by ATP binding, the crystal structure also suggests that adenine binding promotes the first docking process (substrate recognition) but not the large conformational transition of the  $\beta$  subunit from the open to the closed form.

The single-molecule manipulation data from this study strongly support this contention. We quantitatively measured the change in affinity for UTP upon  $\gamma$ -subunit rotation. Although the absolute value of the rate constant or dissociation constant of UTP at individual rotary angles was 1000 times lower than that of ATP, similar to the findings for ATP, UTP still showed significant angle-dependent affinity changes upon  $\gamma$ -subunit rotation. Therefore, the energy released upon the rotation-coupled affinity change during UTP-driven rotation is comparable to that released during ATP-driven rotation. The similarity between the angle-dependent affinity changes for  $K_d^{UTP}$  and  $K_d^{ATP}$  suggests that the base residue of ATP is not involved in the rotation-coupled affinity change. These findings are consistent with the abovementioned features of the crystal structures. To confirm this point, we attempted to investigate the angle-dependent affinity change of RTP. However, the difficulty of performing the rotation assay prevented us from successfully performing the single-molecule manipulation experiment.

An important question that remains to be answered is whether ribose or phosphate is involved in the change in affinity. Considering that the open  $\beta$  subunit with bound Mg-free ADP showed a conformation distinct from that of the closed  $\beta$  subunit around the phosphate-binding regions, it is likely that the phosphate-binding residues are directly involved in the rotation-coupled affinity change (Fig. 5). Supporting this contention, our recent work showed that  $F_1$  mutated at catalytically critical residues, i.e., the p-loop lysine, the glutamic acid of the general base, and the arginine-finger, which are directly involved in phosphate binding, significantly reduced torque, and affinity of ATP, respectively (R. Watanabe and Y. Matsukage et al., unpublished). In contrast, in this study, we show that the torque supported by ATP analogs is constant at  $\sim 40$  pN $\cdot$ nm, irrespective of  $k_{on}$  (Figs. 1 e, 2 c, and S3). This suggests that modulation of phosphate binding also affects torque generation, supporting the abovementioned observations.

From these findings, we propose a simplified model for ATP binding. First, ATP is captured on the catalytic residues of the open  $\beta$  subunit. The binding is dependent on the interaction of the adenine ring with the aromatic residues via  $\pi$ - $\pi$  stacking. Although some phosphate-binding residues are involved in the first docking process, the  $\beta$  subunit

does not undergo a large conformational change at this point. The conformational transition from the open form to the closed form is progressively induced by the stepwise formation of bonds between the phosphate region of ATP and phosphate-binding residues, thus tightening the affinity to ATP. This rotation-coupled affinity change was apparent from the similar dependence on binding angle for ATP, GTP (35), and UTP.

Our previous work estimated the maximum turnover rate for UTP hydrolysis measured in bulk solution with a UTP-regenerating system as  $256$  s $^{-1}$ , which is comparable to that of ATP hydrolysis,  $313$  s $^{-1}$ . The turnover rates of GTP hydrolysis and ITP hydrolysis were reported to be  $157$  s $^{-1}$  and  $257$  s $^{-1}$ , respectively. Although these values range from 50% to 82% relative to the ATP turnover rate, the difference is minor when compared with the significant difference in  $k_{on}$ , which is 4.8, 15, and 1000 times lower for GTP, ITP, and UTP, respectively, than for ATP. Considering that the  $k_{off}$  of GDP, IDP, and UDP should also be significantly different from that of ADP, the narrow range of the turnover rate implies that release of nucleotide diphosphate is not the kinetic bottleneck for  $F_1$  under a substrate-saturated condition, a finding consistent with our reaction scheme, in which the kinetic bottleneck step involves

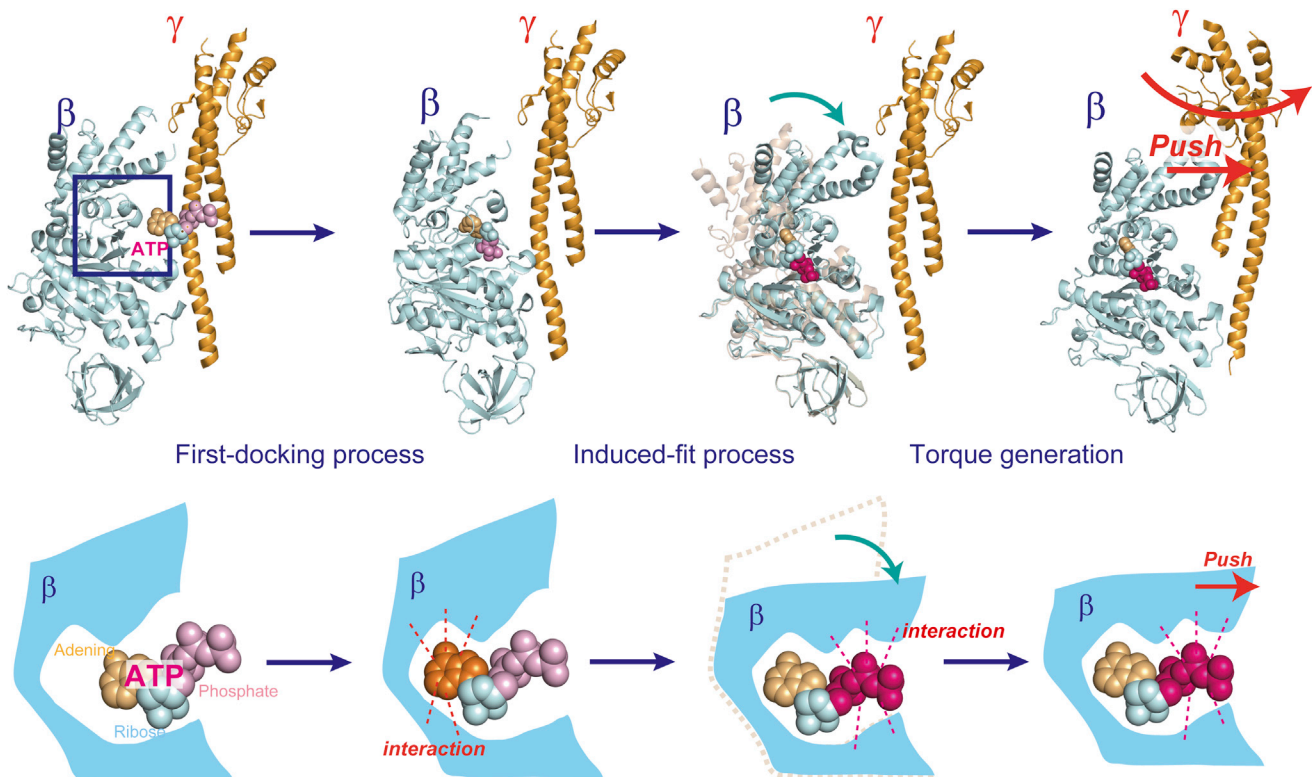

FIGURE 5 Force generation upon ATP binding. Conformational changes of the  $\beta$  subunit against its chemical state (*lower*) or rotation of the  $\gamma$  subunit (*upper*). The ATP binding process consists of two steps, first docking and induced fit. The first-docking process is triggered by base recognition of ATP. The induced-fit process that follows is triggered by phosphate recognition of ATP, which contributes to the torque generation. To see this figure in color, go online.

reactions occurring during the catalytic dwell, i.e., hydrolysis and phosphate release.

The reason that UTP-driven rotation was analyzed in this study, whereas in our previous study it was not, should briefly be mentioned. One of the fundamental differences between the two studies is the purity of the commercially available UTP. The UTP in this work was so pure that further purification was not required, whereas the UTP used in the previous study had several contaminants, including GTP (0.01%) and contaminants of unknown origin (up to 0.39%). Therefore, in the previous study, UTP was purified by chromatography and eluted with 50 mM phosphate. The rotation assay was conducted at a concentration of 300  $\mu$ M UTP, which was the highest concentration available after column purification with 50 mM P<sub>i</sub>. Because P<sub>i</sub> competes for the binding site with UTP, the rotation rate under such conditions is estimated to be 0.06 rps from the inhibitory constant of phosphate,  $K_i^{P_i}$ , which was later determined to be 1.8 mM (supplemental Fig. 3 in our previous article (26)). This estimated rotational rate was close to the detection limit for the rotation assay at that time. Furthermore, the rotation did not show clear stepping under P<sub>i</sub>-competing conditions (26). Thus, it is likely that slow and fluctuating rotation impeded our previous rotation assay.

Other molecular motors have also been reported to hydrolyze different nucleotides or ATP analogs (43–45) and translocate their substrate filaments, i.e., actin for myosin and microtubules for kinesin and dynein. To our knowledge, single-molecule stall force measurements have not been obtained for other motor proteins, for example, myosin, kinesin, and dynein; therefore, the impact of different bases on the energy transduction of these molecular motors is not clear. Considering the structural similarities of molecular motors, especially around the phosphate-binding region, it is likely that other motors also exert force upon bond formation between the phosphate of ATP and phosphate-binding residues. A recent report indicated that even when the adenine ring and ribose were substituted with azobenzene, kinesin still actively slid microtubules by hydrolyzing azobenzene triphosphate (43). Although the effects of azobenzene triphosphate on energy conversion efficiency were not determined, this report also suggests the fundamental role of the phosphate-binding region in chemomechanical coupling in other motors.

## SUPPORTING MATERIAL

One scheme and five figures are available at [http://www.biophysj.org/biophysj/supplemental/S0006-3495\(14\)00514-1](http://www.biophysj.org/biophysj/supplemental/S0006-3495(14)00514-1).

We thank all members of the Noji Laboratory.

This work was supported by Grants-in-Aid for Scientific Research No. 18074005 to H.N. and No. 30540108 to R.W. from the Ministry of Education, Culture, Sports, Science, and Technology, Japan.

## REFERENCES

- Vale, R. D., and R. A. Milligan. 2000. The way things move: looking under the hood of molecular motor proteins. *Science*. 288:88–95.
- Walker, J. E., M. Saraste, ..., N. J. Gay. 1982. Distantly related sequences in the  $\alpha$ - and  $\beta$ -subunits of ATP synthase, myosin, kinases and other ATP-requiring enzymes and a common nucleotide binding fold. *EMBO J.* 1:945–951.
- Schnitzer, M. J. 2001. Molecular motors. Doing a rotary two-step. *Nature*. 410:878–879, 881.
- Abrahams, J. P., A. G. Leslie, ..., J. E. Walker. 1994. Structure at 2.8 Å resolution of F<sub>1</sub>-ATPase from bovine heart mitochondria. *Nature*. 370:621–628.
- Arai, S., S. Saijo, ..., T. Murata. 2013. Rotation mechanism of *Enterococcus hirae* V<sub>1</sub>-ATPase based on asymmetric crystal structures. *Nature*. 493:703–707.
- Yoshida, M., E. Muneyuki, and T. Hisabori. 2001. ATP synthase—a marvelous rotary engine of the cell. *Nat. Rev. Mol. Cell Biol.* 2: 669–677.
- Junge, W., H. Sielaff, and S. Engelbrecht. 2009. Torque generation and elastic power transmission in the rotary F<sub>0</sub>F<sub>1</sub>-ATPase. *Nature*. 459:364–370.
- Weber, J. 2010. Structural biology: Toward the ATP synthase mechanism. *Nat. Chem. Biol.* 6:794–795.
- Itoh, H., A. Takahashi, ..., K. Kinoshita. 2004. Mechanically driven ATP synthesis by F<sub>1</sub>-ATPase. *Nature*. 427:465–468.
- Rondelez, Y., G. Tresset, ..., H. Noji. 2005. Highly coupled ATP synthesis by F<sub>1</sub>-ATPase single molecules. *Nature*. 433:773–777.
- Kabaleeswaran, V., N. Puri, ..., D. M. Mueller. 2006. Novel features of the rotary catalytic mechanism revealed in the structure of yeast F<sub>1</sub> ATPase. *EMBO J.* 25:5433–5442.
- Cingolani, G., and T. M. Duncan. 2011. Structure of the ATP synthase catalytic complex (F<sub>1</sub>) from *Escherichia coli* in an autoinhibited conformation. *Nat. Struct. Mol. Biol.* 18:701–707.
- Noji, H., R. Yasuda, ..., K. Kinoshita, Jr. 1997. Direct observation of the rotation of F<sub>1</sub>-ATPase. *Nature*. 386:299–302.
- Spetzler, D., R. Ishmukhametov, ..., W. D. Frisch. 2009. Single molecule measurements of F<sub>1</sub>-ATPase reveal an interdependence between the power stroke and the dwell duration. *Biochemistry*. 48:7979–7985.
- Iko, Y., Y. Sambongi, ..., M. Futai. 2001. ATP synthase F<sub>1</sub> sector rotation. Defective torque generation in the  $\beta$  subunit Ser-174 to Phe mutant and its suppression by second mutations. *J. Biol. Chem.* 276:47508–47511.
- Sielaff, H., H. Rennekamp, ..., W. Junge. 2008. Domain compliance and elastic power transmission in rotary F<sub>0</sub>F<sub>1</sub>-ATPase. *Proc. Natl. Acad. Sci. USA*. 105:17760–17765.
- Bilyard, T., M. Nakanishi-Matsui, ..., R. M. Berry. 2013. High-resolution single-molecule characterization of the enzymatic states in *Escherichia coli* F<sub>1</sub>-ATPase. *Philos. Trans. R. Soc. Lond. B Biol. Sci.* 368:20120023.
- Kagawa, R., M. G. Montgomery, ..., J. E. Walker. 2004. The structure of bovine F<sub>1</sub>-ATPase inhibited by ADP and beryllium fluoride. *EMBO J.* 23:2734–2744.
- Komoriya, Y., T. Ariga, ..., H. Noji. 2012. Principal role of the arginine finger in rotary catalysis of F<sub>1</sub>-ATPase. *J. Biol. Chem.* 287:15134–15142.
- Nadanaciva, S., J. Weber, ..., A. E. Senior. 1999. Importance of F<sub>1</sub>-ATPase residue  $\alpha$ -Arg-376 for catalytic transition state stabilization. *Biochemistry*. 38:15493–15499.
- Uchihashi, T., R. Iino, ..., H. Noji. 2011. High-speed atomic force microscopy reveals rotary catalysis of rotorless F<sub>1</sub>-ATPase. *Science*. 333:755–758.
- Yasuda, R., H. Noji, ..., M. Yoshida. 1998. F<sub>1</sub>-ATPase is a highly efficient molecular motor that rotates with discrete 120° steps. *Cell*. 93:1117–1124.



23. Shimabukuro, K., R. Yasuda, ..., M. Yoshida. 2003. Catalysis and rotation of  $F_1$  motor: cleavage of ATP at the catalytic site occurs in 1 ms before  $40^\circ$  substep rotation. *Proc. Natl. Acad. Sci. USA.* 100:14731–14736.
24. Adachi, K., K. Oiwa, ..., K. Kinoshita, Jr. 2007. Coupling of rotation and catalysis in  $F_1$ -ATPase revealed by single-molecule imaging and manipulation. *Cell.* 130:309–321.
25. Nishizaka, T., K. Oiwa, ..., K. Kinoshita, Jr. 2004. Chemomechanical coupling in  $F_1$ -ATPase revealed by simultaneous observation of nucleotide kinetics and rotation. *Nat. Struct. Mol. Biol.* 11:142–148.
26. Watanabe, R., R. Iino, ..., H. Noji. 2008. Temperature-sensitive reaction intermediate of  $F_1$ -ATPase. *EMBO Rep.* 9:84–90.
27. Yasuda, R., H. Noji, ..., H. Itoh. 2001. Resolution of distinct rotational substeps by submillisecond kinetic analysis of  $F_1$ -ATPase. *Nature.* 410:898–904.
28. Watanabe, R., R. Iino, and H. Noji. 2010. Phosphate release in  $F_1$ -ATPase catalytic cycle follows ADP release. *Nat. Chem. Biol.* 6:814–820.
29. Shimo-Kon, R., E. Muneyuki, ..., K. Kinoshita, Jr. 2010. Chemo-mechanical coupling in  $F_1$ -ATPase revealed by catalytic site occupancy during catalysis. *Biophys. J.* 98:1227–1236.
30. Ariga, T., E. Muneyuki, and M. Yoshida. 2007.  $F_1$ -ATPase rotates by an asymmetric, sequential mechanism using all three catalytic subunits. *Nat. Struct. Mol. Biol.* 14:841–846.
31. Rosing, J., C. Kayalar, and P. D. Boyer. 1977. Evidence for energy-dependent change in phosphate binding for mitochondrial oxidative phosphorylation based on measurements of medium and intermediate phosphate-water exchanges. *J. Biol. Chem.* 252:2478–2485.
32. Yagi, H., N. Kajiwara, ..., H. Akutsu. 2009. Stepwise propagation of the ATP-induced conformational change of the  $F_1$ -ATPase  $\beta$  subunit revealed by NMR. *J. Biol. Chem.* 284:2374–2382.
33. Masaike, T., F. Koyama-Horibe, ..., T. Nishizaka. 2008. Cooperative three-step motions in catalytic subunits of  $F_1$ -ATPase correlate with  $80^\circ$  and  $40^\circ$  substep rotations. *Nat. Struct. Mol. Biol.* 15:1326–1333.
34. Adachi, K., K. Oiwa, ..., K. Kinoshita, Jr. 2012. Controlled rotation of the  $F_1$ -ATPase reveals differential and continuous binding changes for ATP synthesis. *Nat. Commun.* 3:1022.
35. Watanabe, R., D. Okuno, ..., H. Noji. 2012. Mechanical modulation of catalytic power on  $F_1$ -ATPase. *Nat. Chem. Biol.* 8:86–92.
36. Noji, H., D. Bald, ..., K. Kinoshita, Jr. 2001. Purine but not pyrimidine nucleotides support rotation of  $F_1$ -ATPase. *J. Biol. Chem.* 276:25480–25486.
37. Suzuki, T., C. Wakabayashi, ..., M. Yoshida. 2011. Modulation of nucleotide specificity of thermophilic  $F_0F_1$ -ATP synthase by  $\epsilon$ -subunit. *J. Biol. Chem.* 286:16807–16813.
38. Okuno, D., R. Iino, and H. Noji. 2010. Stiffness of  $\gamma$  subunit of  $F_1$ -ATPase. *Eur. Biophys. J.* 39:1589–1596.
39. Tanigawara, M., K. V. Tabata, ..., H. Noji. 2012. Role of the DELSEED loop in torque transmission of  $F_1$ -ATPase. *Biophys. J.* 103:970–978.
40. Bowler, M. W., M. G. Montgomery, ..., J. E. Walker. 2007. Ground state structure of  $F_1$ -ATPase from bovine heart mitochondria at 1.9 Å resolution. *J. Biol. Chem.* 282:14238–14242.
41. Menz, R. I., J. E. Walker, and A. G. Leslie. 2001. Structure of bovine mitochondrial  $F_1$ -ATPase with nucleotide bound to all three catalytic sites: implications for the mechanism of rotary catalysis. *Cell.* 106:331–341.
42. Rees, D. M., M. G. Montgomery, ..., J. E. Walker. 2012. Structural evidence of a new catalytic intermediate in the pathway of ATP hydrolysis by  $F_1$ -ATPase from bovine heart mitochondria. *Proc. Natl. Acad. Sci. USA.* 109:11139–11143.
43. Perur, N., M. Yahara, ..., N. Tamaoki. 2013. A non-nucleoside triphosphate for powering kinesin-microtubule motility with photo-tunable velocity. *Chem. Commun. (Camb.)* 49:9935–9937.
44. Kamei, T., T. Fukaminato, and N. Tamaoki. 2012. A photochromic ATP analogue driving a motor protein with reversible light-controlled motility: controlling velocity and binding manner of a kinesin-microtubule system in an in vitro motility assay. *Chem. Commun. (Camb.)* 48:7625–7627.
45. Imamura, H., M. Takeda, ..., K. Yokoyama. 2005. Rotation scheme of  $V_1$ -motor is different from that of  $F_1$ -motor. *Proc. Natl. Acad. Sci. USA.* 102:17929–17933.

## Supporting Information

### Torque generation mechanism of F<sub>1</sub>-ATPase upon NTP binding

Hideobu C Arai\*§, Ayako Yukawa\*§, Ryu John Iwatate†, Mako Kamiya†, Rikiya Watanabe\*‡, Yasuteru Urano† & Hiroyuki Noji\*

*\* Department of Applied Chemistry, School of Engineering, The University of Tokyo, Bunkyo-ku, Tokyo 113-8656, JAPAN*

*† Laboratory of Chemical Biology and Molecular Imaging, School of Medicine, The University of Tokyo, Bunkyo-ku, Tokyo 113-8656, JAPAN*

*‡ PRESTO, JST, Bunkyo-ku, Tokyo 113-8656, JAPAN*

*§ These authors contributed equally to this work.*

## 1, Assessment of the purity of UTP solution

Purity of UTP solution (Roche, Switzerland) was assessed using HPLC with a hydrophobic column. Nucleotides were applied on ODS-80Ts (TOSOH, Japan) equilibrated with 100 mM sodium phosphate (pH 6.9) and eluted with an isocratic flow of the buffer containing 100 mM sodium phosphate (pH 6.9) and 4 mM EDTA. We monitored the absorbance at the 260 nm wavelength ( $A_{260}$ ). When we applied 100  $\mu$ M UTP or 100  $\mu$ M ATP, the elution profiles of  $A_{260}$  as shown in Fig. S1a were obtained. From the profiles, we identified the elution volume of UTP and ATP as 2.3 mL and 6.0 mL, respectively. Then, to assess the contamination of ATP in UTP buffer, we independently applied three samples; 10 mM UTP without ATP (Buffer A), 10 mM UTP with 250 nM ATP (Buffer B), and 10 mM UTP with 1  $\mu$ M ATP (Buffer C), and obtained the elution profiles as shown in Fig. S1b. The peak value at 6.0 mL of Buffer A is much smaller than that of Buffer B, showing that ATP contamination in Buffer A is less than 250 nM. Thus, we confirmed that 10 mM UTP buffer contained less than 250 nM ATP, which represents that ATP contamination was less than 0.0025 % of UTP. Thus, we used commercial UTP solution for a rotation assay without purification.

## 2, Synthesis of ribose-triphosphate (RTP)

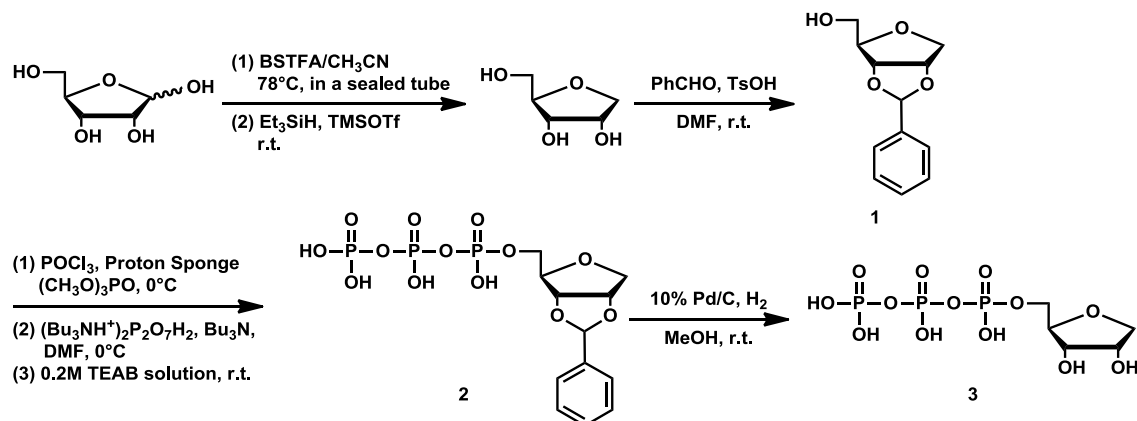

Scheme1. Synthetic scheme for ribose-triphosphate (RTP,3)

**Materials and General Information.** General chemicals were of the best grade available, supplied by Tokyo Chemical Industries, Wako Pure Chemical Industries, Sigma-Aldrich or Dojindo, and were used without further purification. NMR spectra were recorded on a Bruker AVANCE III 400 Nanobay at 400 MHz for <sup>1</sup>H NMR, at 101 MHz for <sup>13</sup>C NMR

and at 162 MHz for  $^{31}\text{P}$  NMR. Chemical shifts ( $\delta$ ) are reported in parts per million (ppm) relative to residual solvents, TEAA or to external standard of 85%  $\text{H}_3\text{PO}_4$ . Mass spectrum (MS) was measured with a MicroTOF (Bruker). Preparative HPLC were performed on an Inertsil ODS-3 (20.0 x 250 mm) column (GL Sciences Inc.) using an HPLC system composed of a pump (PU-2087, JASCO) and a detector (MD-2010, JASCO).

**Preparation of 1,4-Anhydro-2,3-benzylidene-D-ribitol (1).** **1,4-Anhydro-D-ribitol** was prepared according to the literature.<sup>(1)</sup> To a solution of **1,4-Anhydro-D-ribitol** (372.1 mg, 2.48 mmol) in 7.5 ml of DMF, benzaldehyde (278  $\mu\text{l}$ , 2.52 mmol, 1.02 eq) and TsOH (7.5 mg, 0.0436 mmol, 0.018 eq) were added. The reaction mixture was stirred at 70 °C for 20h, then cooled to r.t. The reaction was quenched by addition of  $\text{NaHCO}_3$  (52.0 mg, 0.619 mmol, 0.25 eq), then the solvent was evaporated. The residue was dissolved in water and extracted with  $\text{Et}_2\text{O}$ . The organic layer was evaporated and purified by flash chromatography (silica gel, 5% MeOH /  $\text{CH}_2\text{Cl}_2$ ) to afford 179.9 mg (0.81 mmol, yield: 32.7 %) of colorless oil.  $^1\text{H}$  NMR (400MHz, MeOD):  $\delta$  7.53-7.51 (m, 2H), 7.38-7.36 (m, 3H), 5.77 (s, 1H), 4.86-4.84 (m, 1H), 4.72 (dd, 1H,  $J = 6.5, 1.1$  Hz), 4.22-4.19 (m, 1H), 4.07-3.97 (m, 2H), 3.59-3.56 (m, 2H);  $^{13}\text{C}$  NMR (101 MHz, MeOD):  $\delta$  137.9, 130.6, 129.2, 128.1, 107.3, 86.3, 84.3, 83.4, 73.7, 62.2; HRMS (ESI<sup>+</sup>) Calcd for  $[\text{M}]^+$ , 245.07843; Found 245.07841 (-0.02 mmu).

**Preparation of 2,3-Benzylidene ribose triphosphate (2).** **1** (97.3 mg, 0.438 mmol) and Proton Sponge (938 mg, 4.38 mmol, 10.0 eq) were dried overnight in vacuo, and then dissolved in 12.0 ml of trimethyl phosphate. After the solution was cooled to 0 °C, 87.3  $\mu\text{l}$  (0.832 mmol, 1.9 eq) of phosphorous oxychloride was added, and the reaction mixture was stirred at 0 °C for 2h. Then, a mixture of tributylammonium pyrophosphate (1326 mg, 2.80 mmol, 6.4 eq) and tributylamine (0.39 ml, 1.72 mmol, 3.9 eq) in 5 ml of DMF was added, and stirring was continued at 0 °C for additional 60 min. 5 ml of 0.2M TEAB solution was added to it, and stirred at r.t. for 1h. The reaction mixture was then lyophilized, and purified by preparative HPLC using eluent A (0.1 M TEAA buffer) and eluent B ( $\text{CH}_3\text{CN}$  99 %,  $\text{H}_2\text{O}$  1 %) (A/B = isocratic at 90/10 for 5 min, linear gradient to 50/50 in 40 min, isocratic at 50/50 for 10 min, then linear gradient to 90/10 in 5 min) to

afford 362.2 mg (0.0800 mmol, yield: 18.3 %) of colorless oil as TEA salt.  $^1\text{H}$  NMR (400MHz,  $\text{D}_2\text{O}$ ):  $\delta$  7.35-7.32 (m, 2H), 7.28-7.25 (m, 3H), 5.64 (s, 1H), 4.88-4.85 (m, 2H), 4.22-4.20 (m, 1H), 3.96-3.81 (m, 4H);  $^{13}\text{C}$  NMR (101 MHz,  $\text{D}_2\text{O}$ ):  $\delta$  131.6, 129.9, 128.1, 106.7, 84.2, 84.1, 84.0, 83.2, 74.0, 66.5;  $^{31}\text{P}$  NMR (162 MHz,  $\text{D}_2\text{O}$ ):  $\delta$  -11.4 (d, 1P,  $J = 21$  Hz), -11.9 (d, 1P,  $J = 19.4$  Hz), -23.9 (dd, 1P,  $J = 17.2, 19.4$  Hz); HRMS (ESI) Calcd for  $[\text{M}]^-$ , 460.98092; Found 460.98109 (0.17 mmu).

**Preparation of Ribose triphosphate (3).** **2** (18.8 mg, 0.0407 mmol) was dissolved in MeOH. 10 % palladium on carbon was added to it, and the flask was filled with  $\text{H}_2$  using a pressurized balloon. The reaction mixture was stirred at r.t. for 2h, and then filtered through a Celite pad to remove palladium. The filtrate was concentrated and purified by HPLC to afford 10.3 mg (0.0275 mmol, yield: 67.6 %) of colorless oil.  $^1\text{H}$  NMR (400MHz,  $\text{D}_2\text{O}$ ):  $\delta$  4.21-4.15 (m, 2H), 4.05-3.98 (m, 3H), 3.89 (br s, 1H), 3.71-3.68 (m, 1H);  $^{13}\text{C}$  NMR (101 MHz,  $\text{D}_2\text{O}$ ):  $\delta$  81.0, 72.9, 72.1, 71.6, 66.4;  $^{31}\text{P}$  NMR (162 MHz,  $\text{D}_2\text{O}$ ):  $\delta$  -11.5 (d, 1P,  $J = 17.8$  Hz), -11.6 (d, 1P,  $J = 19.4$  Hz), -24.0 (dd, 1P,  $J = 17.8, 19.4$  Hz); HRMS (ESI) Calcd for  $[\text{M}]^-$ , 372.94962; Found 372.95151 (-1.89 mmu).

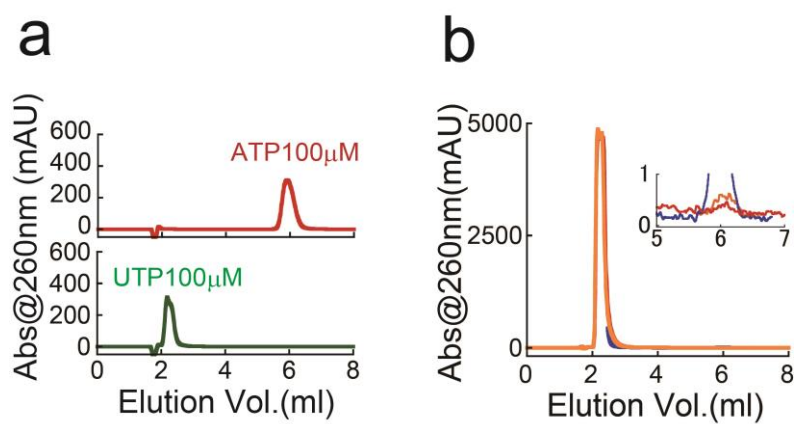

**Fig. S1. Contamination of ATP in UTP solution**

a. Elution profile of 100  $\mu\text{M}$  ATP or UTP monitored as absorbance at 260 nm wave length.

b. Elution profile of 10 mM UTP (red), 10 mM UTP with 250 nM ATP (orange), and 10 mM UTP with 1  $\mu\text{M}$  ATP (blue).

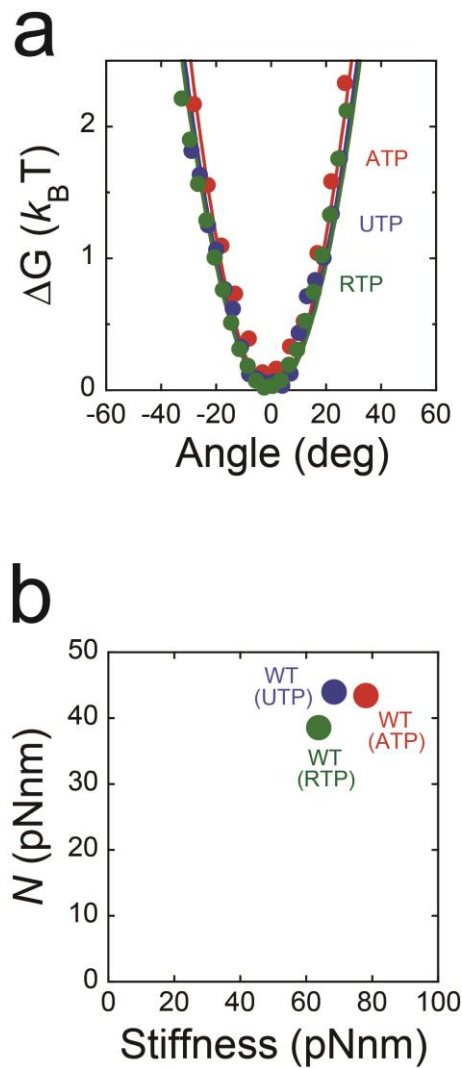

**Fig. S2. Rotary potential**

**a.** Rotary potential of the  $F_1$  NTP waiting state. Probability distributions of angular positions during the NTP-binding pause derived from the trajectories of 3~5 molecules were transformed into rotary potentials according to Boltzmann's law: wild-type  $F_1$  with ATP (red), UTP (blue), and RTP (green). Determined potentials were fitted with the harmonic function  $\Delta G = 1/2 \cdot \kappa \cdot \theta^2$ , where  $\kappa$  is the torsional stiffness. Determined stiffness values were 79, 69, and 64 pN·nm for ATP, UTP, and RTP, respectively. **b.** Rotary torque plotted against rotary potential stiffness.

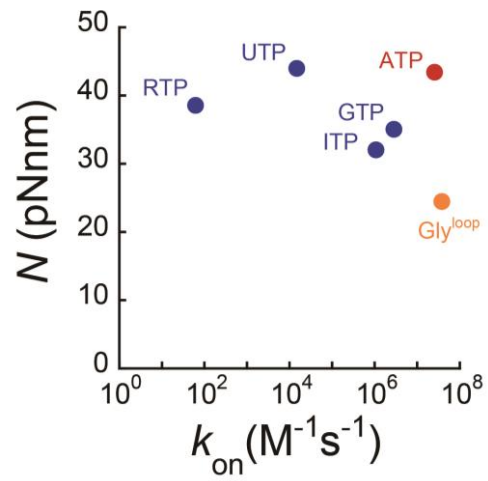

**Fig. S3. Rotary torque plotted against  $k_{on}$**

Blue symbols represent the result using ATP analogs. Orange symbol represents the DELSEED mutant;  $F_1^{glyloop}$  from Ref. (2).



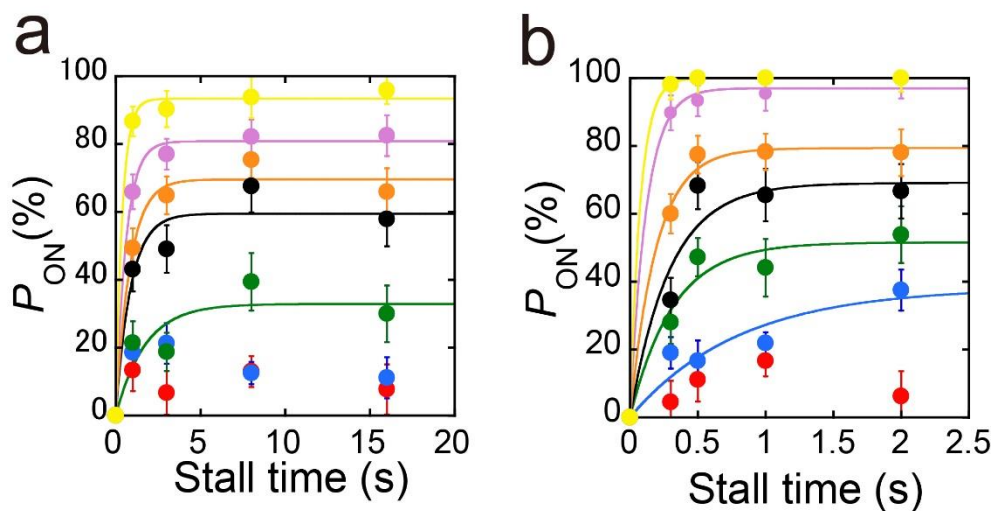

**Fig. S4. Time course of  $P_{ON}$  of UTP binding at 20 and 200  $\mu\text{M}$  UTP**

The time course of  $P_{ON}$  of UTP binding in the presence of 20  $\mu\text{M}$  (a) or 200  $\mu\text{M}$  UTP (b) after stalling at  $-50^\circ$  (red),  $-30^\circ$  (blue),  $-10^\circ$  (green),  $0^\circ$  (black),  $+10^\circ$  (orange),  $+30^\circ$  (pink), and  $+50^\circ$  (yellow) from the original binding angle. These data were fitted with the same function as Fig. 4a.

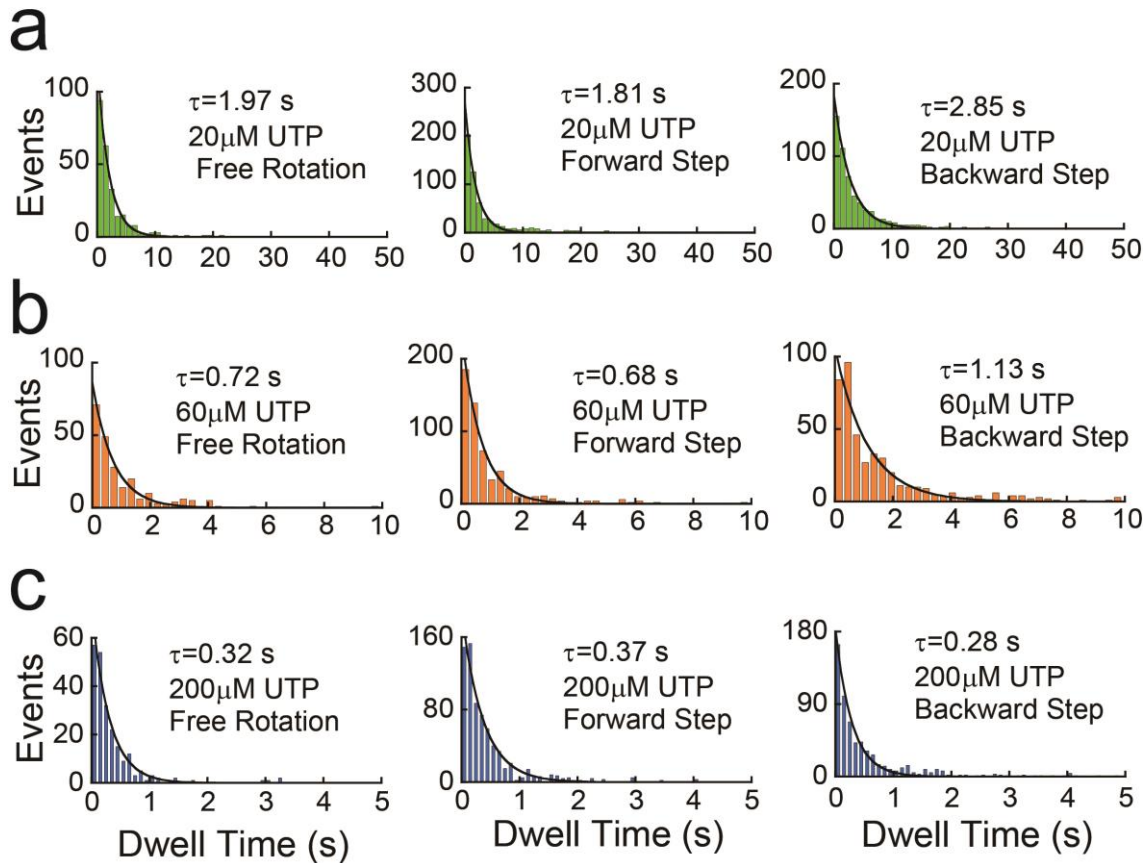

**Fig. S5. Histograms of the dwell time for the UTP binding after stalling**

The top row (light green: **a**), the middle one (orange: **b**) and the bottom one (blue: **c**) show the histograms at 20  $\mu$ M, 60  $\mu$ M and 200  $\mu$ M UTP, respectively. The left column shows the histograms of binding dwells during free rotation. The middle one shows the histograms of binding dwell after the enzyme has reached the ‘ON’ position (Fig. 3b, left). The right one shows the histograms of binding dwells after the enzyme has reached the ‘OFF’ position (Fig. 3b, right). Each analysis was done for the experiments in which the stall time was long enough to reach the plateau levels in each experimental condition; 8-s and 16-s stall times for 20  $\mu$ M UTP, 3-s and 5-s stall times for 60  $\mu$ M UTP, and 1-s and 2-s stall times for 200  $\mu$ M UTP. The time constants determined by fitting are given in each histogram.

## References

1. Alfaro, J. F., T. Zhang, D. P. Wynn, E. L. Karschner, and Z. S. Zhou. 2004. Synthesis of LuxS Inhibitors Targeting Bacterial Cell–Cell Communication. *Org Lett* 6:3043-3046.
2. Tanigawara, M., K. V. Tabata, Y. Ito, J. Ito, R. Watanabe, H. Ueno, M. Ikeguchi, and H. Noji. 2012. Role of the DELSEED Loop in Torque Transmission of F<sub>1</sub>-ATPase. *Biophys J* 103:970-978.
